# Supplementary material for: Energy enhancement of quasi-solid-state supercapacitors based on a non-aqueous gel polymer electrolyteviaa synergistic effect of dual redox additives diphenylamine and potassium iodide
Source: Royal Society of Chemistry journal article supplement (doi:10.1039/d0ta06331b), 2020-01-01
Supplement: d0ta06331b1.pdf [file d0ta06331b1.pdf]

**Energy enhancement of quasi-solid-state supercapacitor based on non-aqueous gel polymer electrolyte via synergistic effect of dual redox-additives diphenyl amine and KI**

Neetu Yadav and S.A. Hashmi  
Department of Physics & Astrophysics, University of Delhi, Delhi-110007, India

**Supporting Information**

**Table-S1:** Fitted parameters of capacitor cells (Cell#1 to Cell#4) by equivalent circuits

| Capacitor Cells | $R_1$ ( $\Omega \text{ cm}^2$ ) | $R_2$ ( $\Omega \text{ cm}^2$ ) | CPE<br>$Q$ ( $\Omega \text{ cm}^2$ ), $n$ | $W$ ( $\Omega \text{ s}^{-1} \text{ cm}^{-2}$ ) | $W_{o1}$<br>$W_{or1}$ ( $\Omega \text{ s}^{0.5} \text{ cm}^{-0.5}$ ),<br>$W_{oc1}$ ( $\Omega \text{ s}^{-0.5} \text{ cm}^{-0.5}$ ) |
|-----------------|---------------------------------|---------------------------------|-------------------------------------------|-------------------------------------------------|------------------------------------------------------------------------------------------------------------------------------------|
| Cell#1          | 18.16                           | 2.99                            | $1.70 \times 10^{-4}$ , 0.73              | 32.45                                           | 2.16, 0.15                                                                                                                         |
| Cell#2          | 7.79                            | 16.31                           | $4.64 \times 10^{-4}$ , 0.34              | 15.49                                           | ----                                                                                                                               |
| Cell#3          | 10.18                           | 1.60                            | $4.10 \times 10^{-4}$ , 0.97              | -----                                           | 7.7, 0.12                                                                                                                          |
| Cell#4          | 14.81                           | 21.88                           | $4.15 \times 10^{-6}$ , 0.82              | ----                                            | ----                                                                                                                               |

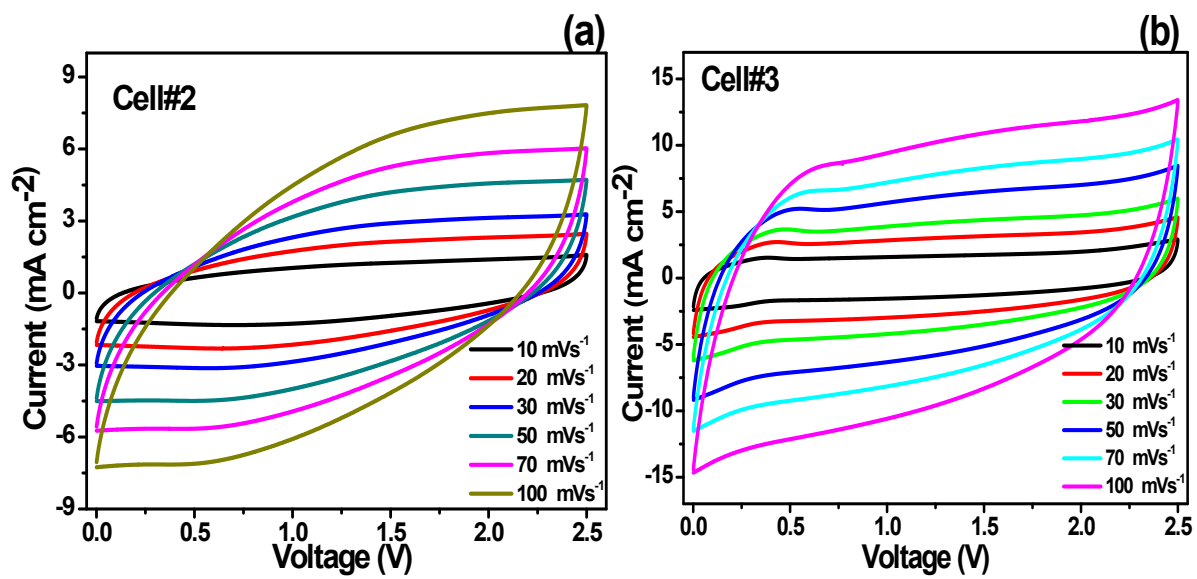

Fig. S1. (a and b) CV curves of capacitor cells (Cell#2 and Cell#3) at different scan rates.

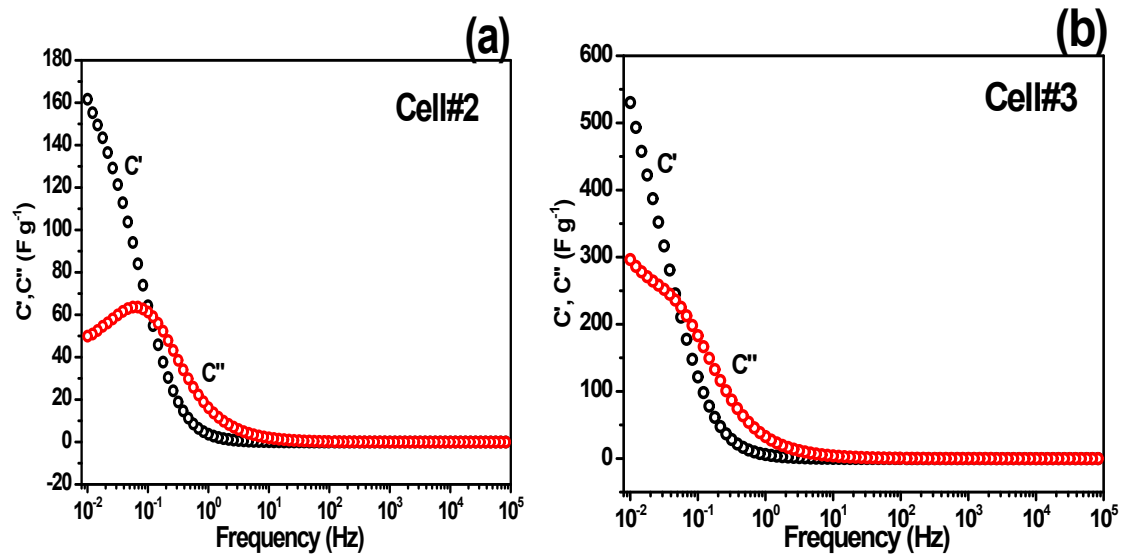

**Fig. S2:**  $C'$  and  $C''$  versus frequency plots for cells containing redox-active GPEs (a) PVdF-HFP/IL/DPA, and (b) PVdF-HFP/IL/KI.

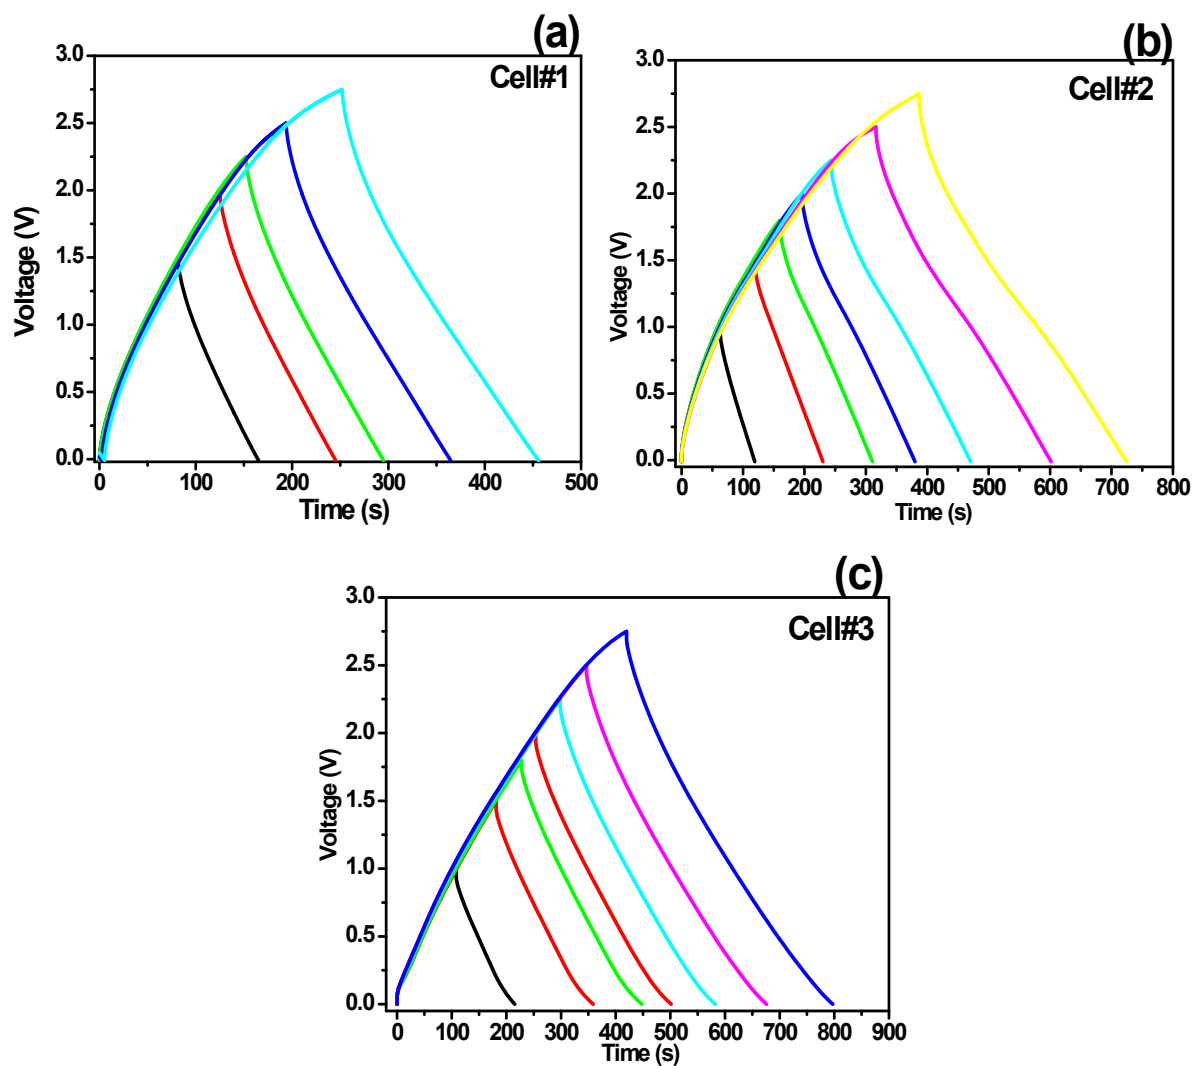

**Fig. S3.** (a-c) GCD curves for capacitor cells (Cell#1 to Cell#3), recorded at different voltage ranges

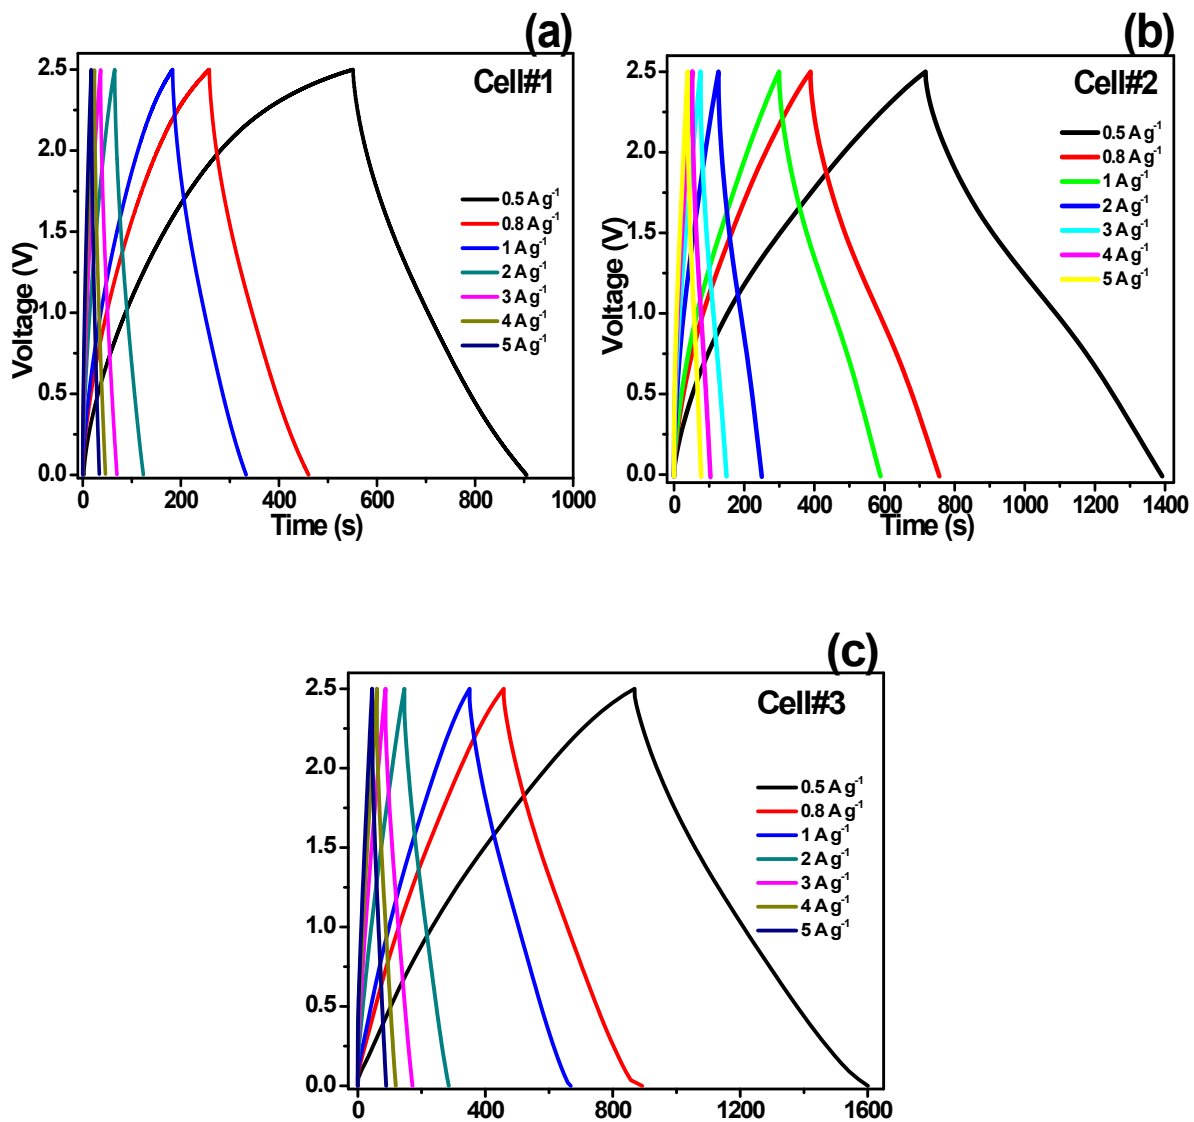

**Fig. S4.** (a-c) GCD curves for capacitor cells (Cell#1 to Cell#3), recorded at different current densities.
